# Supplementary material for: Modeling changes in biomarkers in Gaucher disease patients receiving enzyme replacement therapy using a pathophysiological model
Source: Orphanet J Rare Dis. 2014 Jun 30;9:95. doi: 10.1186/1750-1172-9-95 (PMC4094900; doi:10.1186/1750-1172-9-95)
Supplement: Additional file 1 — Equation describing change in chitotriosidase level. [file 1750-1172-9-95-S1.docx]

**Additional file 1: Equation describing change in chitotriosidase level**

As shown in Figure 1, production of glucosyleceramide decreases during ERT. We assume that the baseline value before treatment is and that it decreases to a value with a rate constant k. Therefore, we modeled as:

The concentration of chitotriosidase can be modeled by the following differential equation:

where is the rate constant of chitotriosidase elimination

The initial condition in the absence of ERT is The analytical solution of this equation is given by:

We consider that the half-life of chitotriosidase is very short compared with the treatment effect, *i.e* . Therefore can be approximated by:

We define , corresponding to the concentration at steady state of ERT for chitotriosidase. Then

We define, corresponding to the amplitude of variation in chitotriosidase, then:
